# Supplementary material
Source: PubMed Central journal article supplement (PMC3690146)
Supplement: NIHMS441755-supplement-01.pdf [file NIHMS441755-supplement-01.pdf]

## Antidepressant Treatment Reduces Serotonin-1A Autoreceptor Binding in Major Depressive Disorder

### Supplemental Information

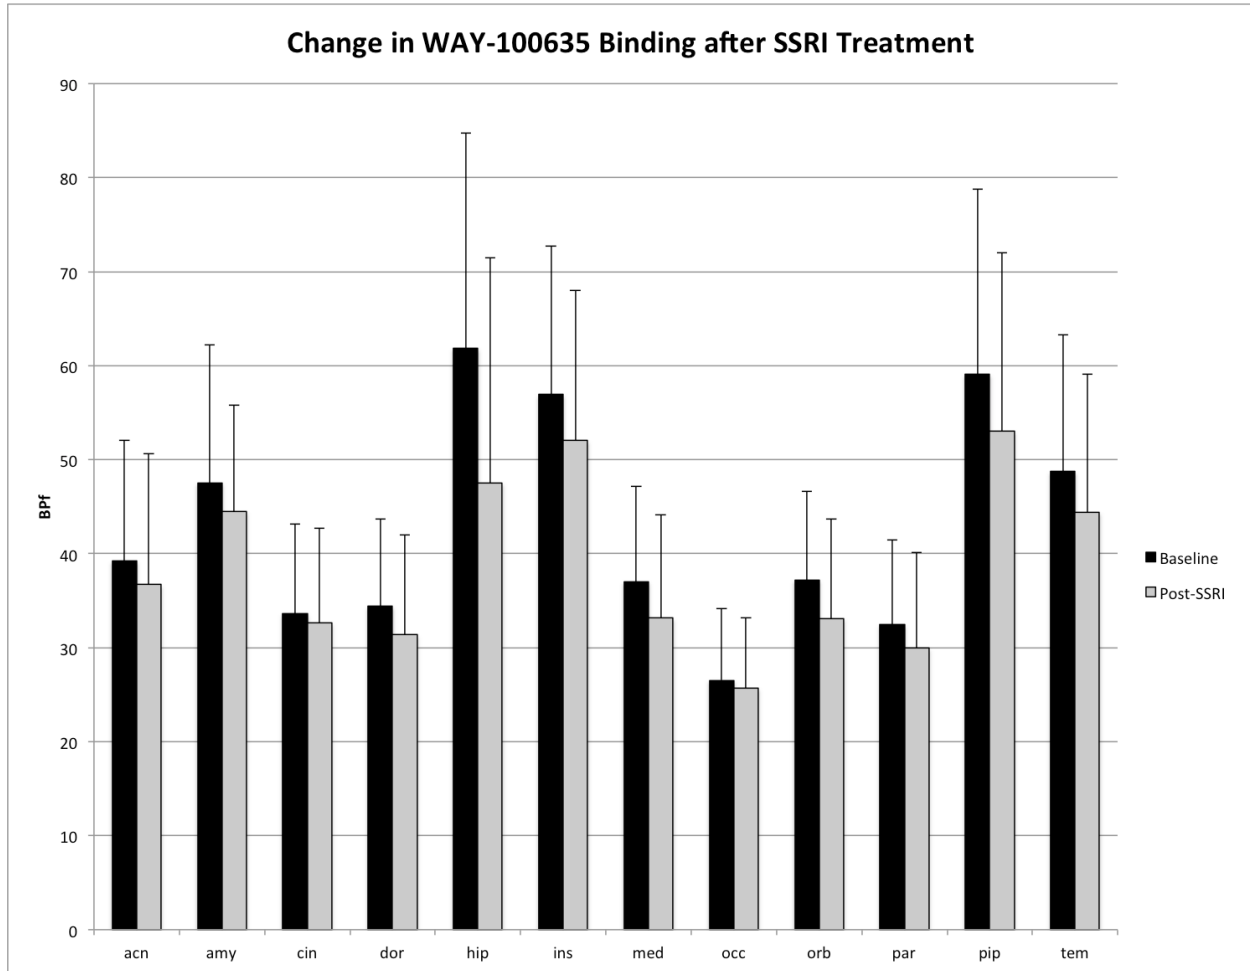

**Figure S1.** 5-HT<sub>1A</sub> binding following selective serotonin reuptake inhibitor (SSRI) treatment in not recently-medicated depressed subjects. No significant effect of treatment ( $df = 1,18$ ;  $F = 2.458$ ;  $p = 0.134$ ) nor of treatment x region interaction ( $df = 11,396$ ;  $F = 0.580$ ;  $p = 0.845$ ) was detected. acn, anterior cingulate; amy, amygdala; cin, cingulate cortex; dor, dorsolateral prefrontal cortex; hip, hippocampus; ins, insular cortex; med, medial prefrontal cortex; occ, occipital cortex; orb, orbital prefrontal cortex; par, parietal cortex; pip, parahippocampal gyrus; tem, temporal cortex.

**Table S1.** Demographic and radiological parameters of all subjects.

|                                              | <b>Subjects (<i>n</i> = 23)</b> |                        |                 |
|----------------------------------------------|---------------------------------|------------------------|-----------------|
| Male <i>n</i> (%)                            | 9 (39%)                         |                        |                 |
| Age ( $\pm$ SD)                              | 42.2 ( $\pm$ 14.1)              |                        |                 |
| Paroxetine <i>n</i> (%)                      | 16 (70%)                        |                        |                 |
| Citalopram* <i>n</i> (%)                     | 7 (30%)                         |                        |                 |
| Age of Onset, Years ( $\pm$ SD)              | 26.5 ( $\pm$ 12.4)              |                        |                 |
| Number of Episodes ( $\pm$ SD)               | 18.3 ( $\pm$ 33.9)              |                        |                 |
| Length of Current Episode, Weeks ( $\pm$ SD) | 50.9 ( $\pm$ 65.5)              |                        |                 |
| Genotype C-1019G                             | CC = 3, CG = 12, GG = 8         |                        |                 |
|                                              | <b>Pre-Treatment</b>            | <b>Post-Treatment</b>  | <b><i>p</i></b> |
| HDRS-24 ( $\pm$ SD, <i>n</i> = 22**)         | 25.2 ( $\pm$ 8.4)               | 12.6 ( $\pm$ 8.4)      | <0.001          |
| Injected Dose, mCi ( $\pm$ SD)               | 7.51 ( $\pm$ 4.19)              | 7.58 ( $\pm$ 3.77)     | 0.933           |
| Injected Mass, $\mu$ g ( $\pm$ SD)           | 1.85 ( $\pm$ 1.21)              | 2.65 ( $\pm$ 2.15)     | 0.054           |
| Specific Activity, mCi/nmol                  | 2.18 ( $\pm$ 1.22)              | 1.73 ( $\pm$ 0.93)     | 0.078           |
| Free Fraction ( $\pm$ SD)                    | 0.0659 ( $\pm$ 0.0230)          | 0.0653 ( $\pm$ 0.0188) | 0.902           |

\* One subject was treated with escitalopram, the S-enantiomer of citalopram.

\*\* One subject did not receive a post-treatment HDRS-24; *n* = 23 for other rows.
